# Supplementary material
Source: PubMed Central journal article supplement (PMC3074948)
Supplement: NIHMS252282-supplement-3.pdf [file NIHMS252282-supplement-3.pdf]

## Supplemental Figure S2

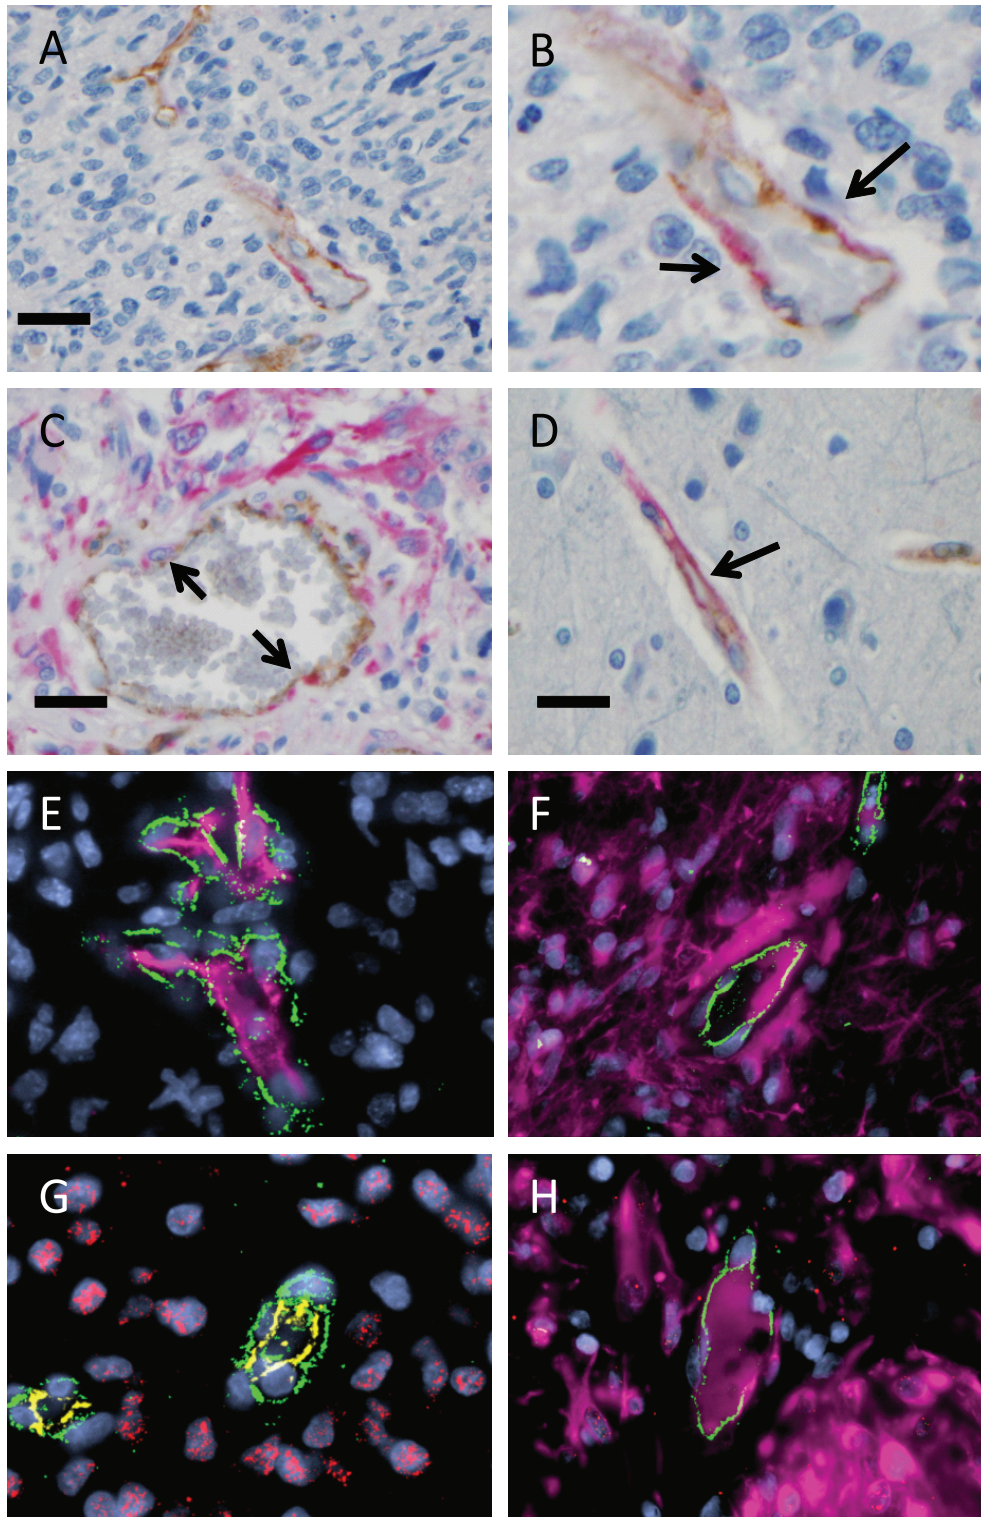

A,B: Representative immunohistochemistry showing co-expression of PDGFR-beta (red) and of the vascular endothelial marker CD31 (brown) in endothelial cells in GBM tissue from control patients (arrows). C, D: Representative immunohistochemistry showing co-expression of nestin (red) and of the vascular endothelial marker CD31 (brown) in endothelial cells in GBM tissue (arrows) both in the central area of the tumor (C) and in the contralateral uninjured brain after cediranib therapy. E: Double immunofluorescence (IF) staining for PDGFR-beta (green) and the endothelial marker CD34 (pink) confirms co-expression of these markers in endothelial cells in GBM. Scale bar represents 50 $\mu$ m. F: Double immunofluorescence for nestin (pink) and the endothelial marker CD34 (green) confirms expression of nestin in endothelial cells and in GBM cells. G and H: Combination of double IF and Fluorescence in situ Hybridization for EGFR gene (red) confirms the expression of PDGFR-beta (green) in endothelial cells (CD34, yellow, panel G), and that nestin (pink) is expressed in endothelial cells (green) as well in GBM cells (panel H).
